# Supplementary material for: Distinct Contributions of Working Memory and Attentional Control to Sentence Comprehension in Noise in Persons With Stroke
Source: J Speech Lang Hear Res. 2021 Jul 20;64(8):3230–41. doi: 10.1044/2021_JSLHR-20-00694 (PMC8740654; doi:10.1044/2021_JSLHR-20-00694)
Supplement: Supplemental Material S2 [file JSLHR-64-3230-s002.pdf]

**Supplemental Material S2.** Multiple regression models predicting mean RT and RT difference scores for persons with aphasia only.

**Mean RT: Sentences in Multispeakers**

Overall model:  $F(4, 9) = 1.17, p = .39, R^2 = .34$

| Predictors          | $\beta$ | $t$   | $p$ |
|---------------------|---------|-------|-----|
| Age                 | 0.38    | 1.25  | .24 |
| Hearing Status      | 0.07    | 0.19  | .86 |
| Working Memory      | -0.42   | -1.50 | .17 |
| Attentional Control | 0.22    | 0.73  | .49 |

**Mean RT: Sentences in Broadband Noise**

Overall model:  $F(4, 9) = 1.43, p = .30, R^2 = .39$

| Predictors          | $\beta$ | $t$   | $p$ |
|---------------------|---------|-------|-----|
| Age                 | 0.44    | 1.48  | .17 |
| Hearing Status      | -0.06   | -0.19 | .86 |
| Working Memory      | -0.34   | -1.26 | .24 |
| Attentional Control | -0.39   | -1.33 | .22 |

**Mean RT: Sentences in Silence**

Overall model:  $F(4, 9) = 0.59, p = .68, R^2 = .21$

| Predictors          | $\beta$ | $t$   | $p$ |
|---------------------|---------|-------|-----|
| Age                 | 0.34    | 1.00  | .34 |
| Hearing Status      | 0.18    | 0.47  | .65 |
| Working Memory      | -0.23   | -0.74 | .48 |
| Attentional Control | 0.07    | 0.21  | .84 |

**RT Difference: Effect of Informational Masking**

Overall model:  $F(4, 9) = 4.08, p = .04, R^2 = .64$

| Predictors          | $\beta$ | $t$   | $p$  |
|---------------------|---------|-------|------|
| Age                 | -0.03   | -0.14 | .89  |
| Hearing Status      | 0.20    | 0.78  | .46  |
| Working Memory      | -0.14   | -0.67 | .52  |
| Attentional Control | 0.84    | 3.77  | .004 |

**RT Difference: Effect of Energetic Masking†**

Overall model:  $F(4, 8) = 3.67, p = .62, R^2 = .049$

| Predictors          | $\beta$ | $t$   | $p$  |
|---------------------|---------|-------|------|
| Age                 | -0.10   | -0.45 | .67  |
| Hearing Status      | -0.14   | -0.52 | .62  |
| Working Memory      | -0.13   | -0.61 | .56  |
| Attentional Control | -0.84   | -3.64 | .005 |

†Model is not significant with attentional control outlier removed.
